# Supplementary material
Source: PubMed Central journal article supplement (PMC3367093)
Supplement: NIHMS373938-supplement-01.pdf [file NIHMS373938-supplement-01.pdf]

## Supporting Information

# Label-free, multiplexed detection of bacterial tmRNA using silicon photonic microring resonators

Ott Scheler<sup>1,2</sup>, Jared T. Kindt<sup>2</sup>, Abraham J. Qavi<sup>2</sup>, Lauris Kaplinski<sup>3</sup>, Barry Glynn<sup>4</sup>, Thomas Barry<sup>4</sup>,  
Ants Kurg,<sup>1</sup> and Ryan C. Bailey\*<sup>2</sup>

<sup>1</sup>Department of Biotechnology, Institute of Molecular and Cellular Biology, University of Tartu, Riia 23  
51010 Tartu, Estonia

<sup>2</sup>Department of Chemistry, University of Illinois at Urbana–Champaign, 600 South Mathews Avenue,  
Urbana, Illinois 61801, United States

<sup>3</sup>Department of Bioinformatics, Institute of Molecular and Cellular Biology, University of Tartu, Riia 23  
51010 Tartu, Estonia

<sup>4</sup>Molecular Diagnostics Research Group, NCBES National University of Ireland–Galway, Galway, Republic  
of Ireland

\*Corresponding author: [baileyc@illinois.edu](mailto:baileyc@illinois.edu)

### Table to Contents

|                                                                  |   |
|------------------------------------------------------------------|---|
| SEM of microring .....                                           | 2 |
| Hybridization response as a function of fragmentation time ..... | 3 |
| Sequences of <i>ssrA</i> genes .....                             | 4 |
| Fitting parameters for concentration dependent response .....    | 5 |

## SEM Image of Microring Resonator

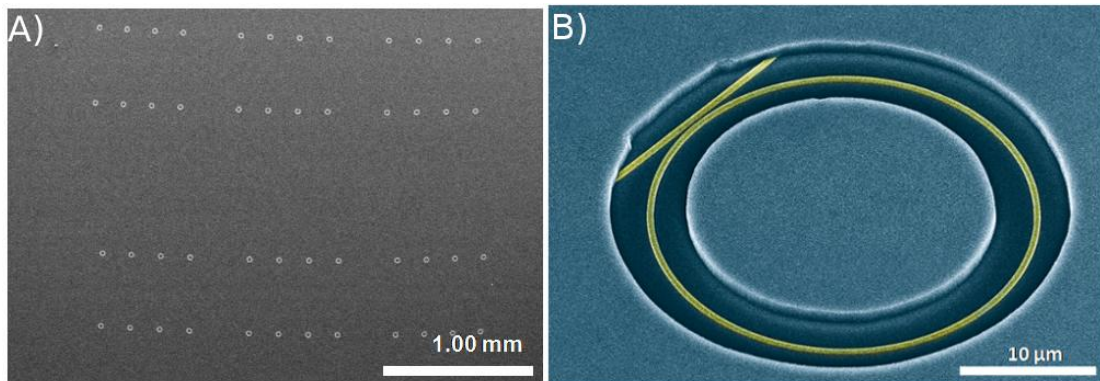

**Figure S1.** A) Each 6 x 6 mm sensor chip contains an array of 32 microring sensors, of which 24 are active and 8 are thermal reference controls. The 200 μm spacing between sensors enables the rings to be individually addressed with standard spotting technologies. B) False color SEM image of the interface between the microring structure and the adjacent linear waveguide as seen through the annular opening in the fluoropolymer cladding layer. The microring diameter is 30 μm and the waveguide separation is 200 nm.

## Hybridization response as a function of fragmentation time

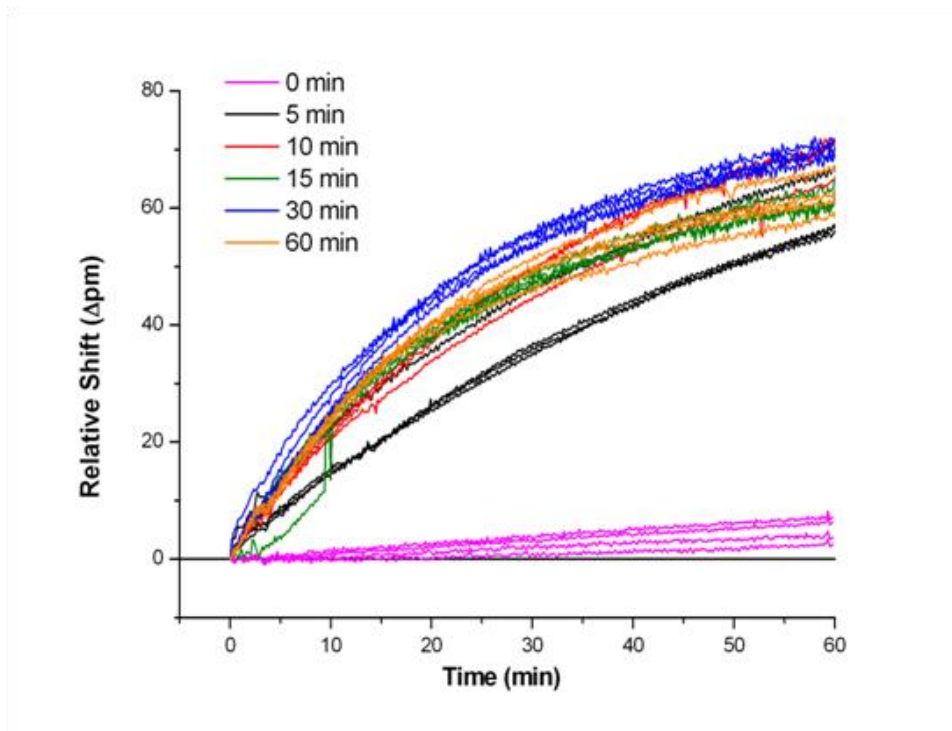

**Figure S2.** Varied hybridization responses as a function of fragmentation time, ranging from 0 to 60 minutes. 15 minutes was used in experiments, as it was the minimal time required to achieve complete fragmentation. The results of at least three separate identically modified microrings are plotted.

**Sequences of *ssrA* genes:** Genes were cloned into plasmid vectors, and degenerate *ssrA* primers were used to prepare and sequence amplicons from target organisms. Sequences have been edited to remove ambiguous readings from ends.

>*Streptococcus pneumoniae* ATCC 33400

TTCGACAGGCATTATGAGGCATATTTTTCGACTCGTGTGGCGACGTAAACGCTCAGTTAAATATAACTGCAAAAAA  
TAACACTTCTTACGCTCTAGCTGCCTAAAAACCAGCAGGCGTGACCCGATTTGGATTGCTCGTGTTCATGACAGG  
TCTTATTATTAGCGAGATACGATTAAGCCTTGTCTAGCGGCTTGATAAGAGATTGATAGACTCGCAGTTTCTAGACT  
TGAGTTATGTGTCGAGGGGCTGTAAAATAATACATAACCTATGGTTGTAGACAAATATGTTGGCAGGTGTTTGGACG

>*Streptococcus agalactiae*

TTCGACAGGCATTATGAGGTATATTTTCGCGACTCATCGGCAGATGTAAAATGCCAGTTAAATATAACTGCAAAAAA  
TACAAATTCTTACGCATTAGCTGCCTAAAAACAGCCTGCGTGATCTTCAAGATTGTTTTCGTTTTGCTAGAAAGG  
TCTTATTATCAGCAAACACTACGTTTGGCTACTGTCTAGTTAGTTAAAAAGAGATTTATAGACTCGCTATGTGAGGGC  
TTGAGTTATGTGTCATCACCTAGTTAAATCAATACATAACCTATAGTTGTAGACAAATATATTAGCAGATGTTTGGACG

>*Enterococcus faecium*

GGGGACGTTACGGATTTCGACAGGCACAGTCGAGCTTGAATTGCGTTTTCGTAGGTTACGTCTACGTAAAAACGTTA  
CAGTTAAATATAACTGCTAAAAACGAAAACAACTCTTACGCTTTAGCTGCCTAAAAACAGTTAGCGTAGATCCTCTC  
GGCATCGCCCATGTGCTCGAGTAAGGGTCCTAACTTTAGTGGGATACGTTTCAACTTTCCGTCTGTAAGTTGAAAA  
AGAGAACATCAGACTAGCGATACAGAATGCCTGTCACTCGGCAAGCTGTAAAGTGAATCCTAAATGAGTTGACT  
ATGAACGTAGATTTTTAAGTGGCGATGTGTTTGGACGCGGGTTCGACTCCCGCGTCTCCACCA

>*Klebsiella pneumoniae* ATCC 13883

TTCGACGGGATTTGCGAAACCCAAGGTGCATGCCGAGGGGCGGTTGGCCTCGTAAAAAGCCGCAAAAAATAGTC  
GCAAACGACGAAAACACTACGCTTTAGCAGCTTAATAACCTGCTCTGAGCCCTCTCTCCCTAGCTTCCGCTCTTAAGAC  
GGGGATCAAAGAGAGGTCAAACCCAAAAGAGATCGCGTGGATGCCCTGCCTGGGGTTGAAGCGTTAAATCTAAT  
CAGGCTAGTTTGTAGTGGCGTGTCTGTCCGCAGCTGGCAAGCGAATGTAAAGACTGACTAAGCATGTAGTGCCG  
AGGATGTAGGAATTTTCGGACC

**Table S1.** Fitting parameters utilized for the 1:1 Langmuir kinetic binding isotherm for varying concentrations of tmRNA.

| tmRNA     | A (pm)  | B (min <sup>-1</sup> ) | t <sub>0</sub> (min) | AB (pm/min) | χ <sup>2</sup> | R <sup>2</sup> |
|-----------|---------|------------------------|----------------------|-------------|----------------|----------------|
| 16.6 pmol | 92.5754 | 0.1730                 | -1.2423              | 16.0156     | 9.8382         | 0.9577         |
|           | 89.5685 | 0.1652                 | -1.2827              | 14.7967     | 8.7604         | 0.9612         |
|           | 91.9702 | 0.1854                 | -1.1798              | 17.0513     | 7.7875         | 0.9638         |
| 5.24 pmol | 81.8943 | 0.0894                 | -0.7974              | 7.3173      | 3.2140         | 0.9909         |
|           | 87.7340 | 0.0805                 | -0.8410              | 7.0582      | 1.8900         | 0.9955         |
|           | 80.7949 | 0.0928                 | -0.6570              | 7.4953      | 1.7206         | 0.9950         |
| 1.66 pmol | 77.6464 | 0.0334                 | -0.0376              | 2.5942      | 0.3331         | 0.9991         |
|           | 79.0721 | 0.0351                 | 0.0541               | 2.7723      | 0.3133         | 0.9992         |
|           | 95.7390 | 0.0280                 | 1.1308               | 2.6826      | 7.4294         | 0.9859         |
|           | 67.4506 | 0.0442                 | 0.2027               | 2.9779      | 0.3974         | 0.9987         |
| 524 fmol  | 84.9326 | 0.0108                 | 0.8607               | 0.9207      | 0.6647         | 0.9953         |
|           | 64.3997 | 0.0138                 | -0.0996              | 0.8900      | 0.6270         | 0.9943         |
|           | 75.1582 | 0.0103                 | -0.1769              | 0.7704      | 0.5990         | 0.9940         |

**Table S2.** Fitting parameters utilized for linear fits for varying concentrations of tmRNA

| <b>tmRNA</b> | <b>Slope (pm/min)</b> | <b>Slope Error (pm/min)</b> | <b>Intercept (pm)</b> | <b>Intercept Error (pm)</b> | <b>R<sup>2</sup></b> |
|--------------|-----------------------|-----------------------------|-----------------------|-----------------------------|----------------------|
| 166 fmol     | 0.5270                | 0.0817                      | 0.1612                | 0.0024                      | 0.9253               |
|              | -1.3564               | 0.0877                      | 0.2047                | 0.0025                      | 0.9455               |
|              | 1.0046                | 0.0845                      | 0.1403                | 0.0024                      | 0.8976               |
|              | -0.1234               | 0.0828                      | 0.1295                | 0.0024                      | 0.8863               |
| 0 fmol       | -0.7517               | 0.0767                      | 0.0079                | 0.0022                      | 0.0297               |
|              | -0.0098               | 0.0804                      | -0.0265               | 0.0023                      | 0.2538               |
|              | -0.6313               | 0.0858                      | -0.0504               | 0.0025                      | 0.5217               |
|              | -1.4223               | 0.0780                      | -0.0592               | 0.0023                      | 0.6449               |
